# Supplementary material for: Enhancing catalytic activity of Cr2O3 in CO2-assisted propane dehydrogenation with effective dopant engineering: a DFT-based microkinetic simulation
Source: Royal Society of Chemistry journal article supplement (doi:10.1039/d3cp05548e), 2024-01-01
Supplement: d3cp05548e1.pdf [file d3cp05548e1.pdf]

## Supporting information

### Enhancing Catalytic Activity of $\text{Cr}_2\text{O}_3$ in $\text{CO}_2$ -assisted Propane Dehydrogenation with Effective Dopant Engineering: A DFT-Based Microkinetic Simulation

Faheem Jan<sup>1,2</sup>, Shuaike Zhi<sup>1,2</sup>, XiaoYing Sun<sup>3\*</sup> and Bo Li<sup>3\*</sup>

<sup>1</sup>Shenyang National Laboratory for Materials Science, Institute of Metal Research, Chinese Academy of Sciences, Shenyang, Liaoning, China.

<sup>2</sup>School of Materials Science and Engineering, University of Science and Technology of China, Shenyang, Liaoning, China.

<sup>3</sup>Institute of Catalysis for Energy and Environment, College of Chemistry and Chemical Engineering, Shenyang Normal University, Shenyang, China.

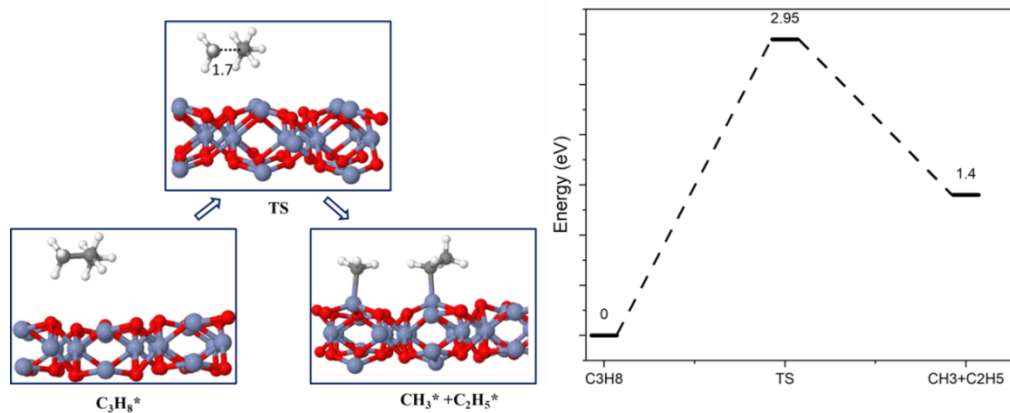

Figure S1 Reaction path for the cracking of  $\text{C}_3\text{H}_8$  to  $\text{CH}_3$  and  $\text{C}_2\text{H}_5$ .

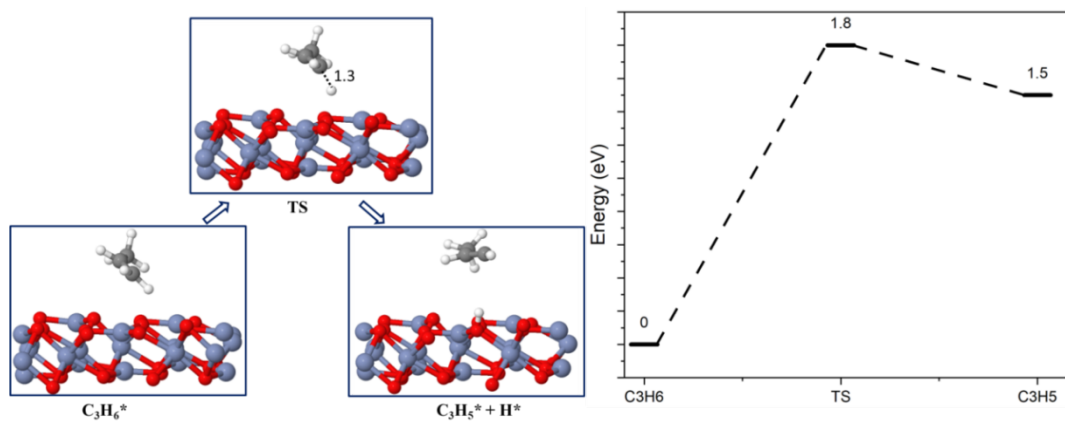

Figure S2 Deep dehydrogenation of  $\text{C}_3\text{H}_6$  to  $\text{C}_3\text{H}_5$ .

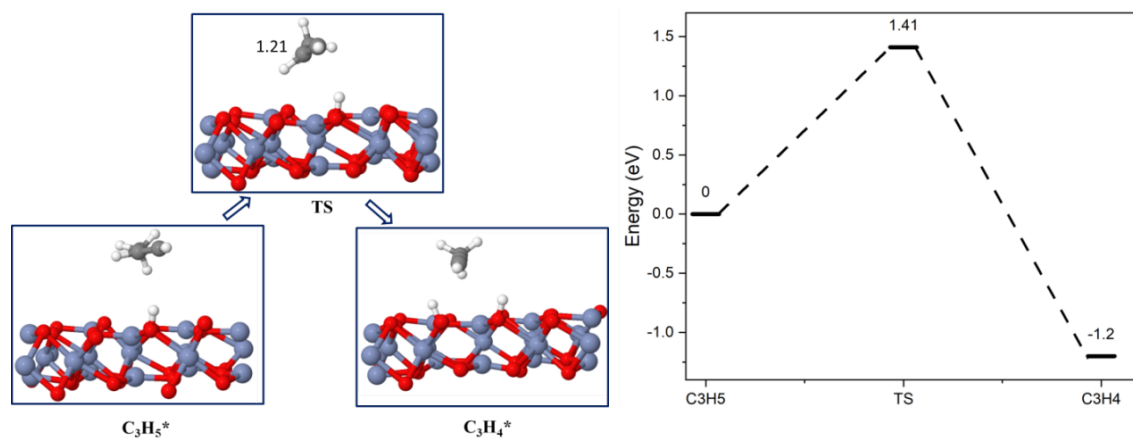

Figure S3 Deep dehydrogenation of  $C_3H_5$  to  $C_3H_4$ .

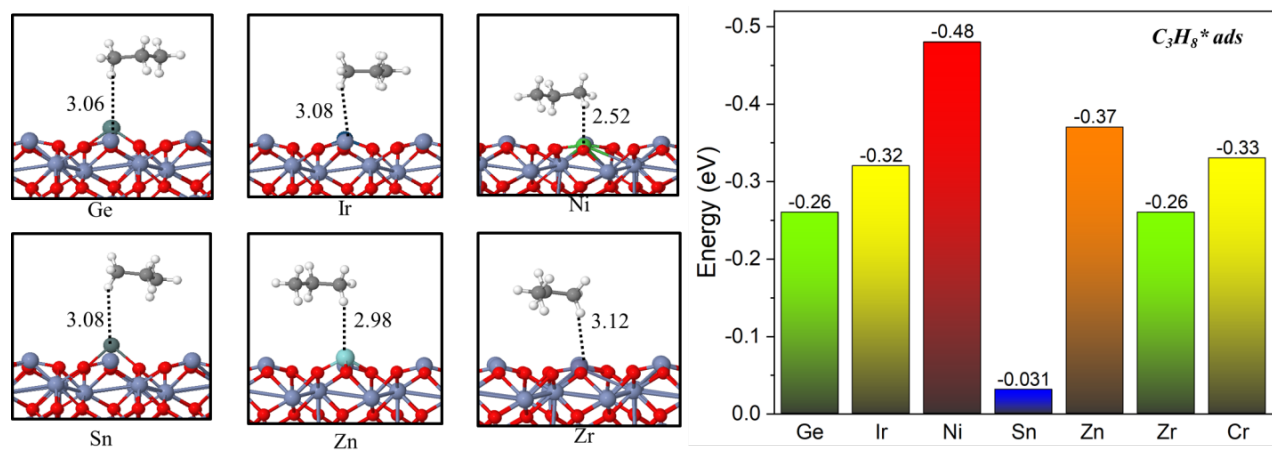

Figure S4 Adsorption energies of propane molecule on  $Cr_2O_3$  and  $M-Cr_2O_3$  surfaces.

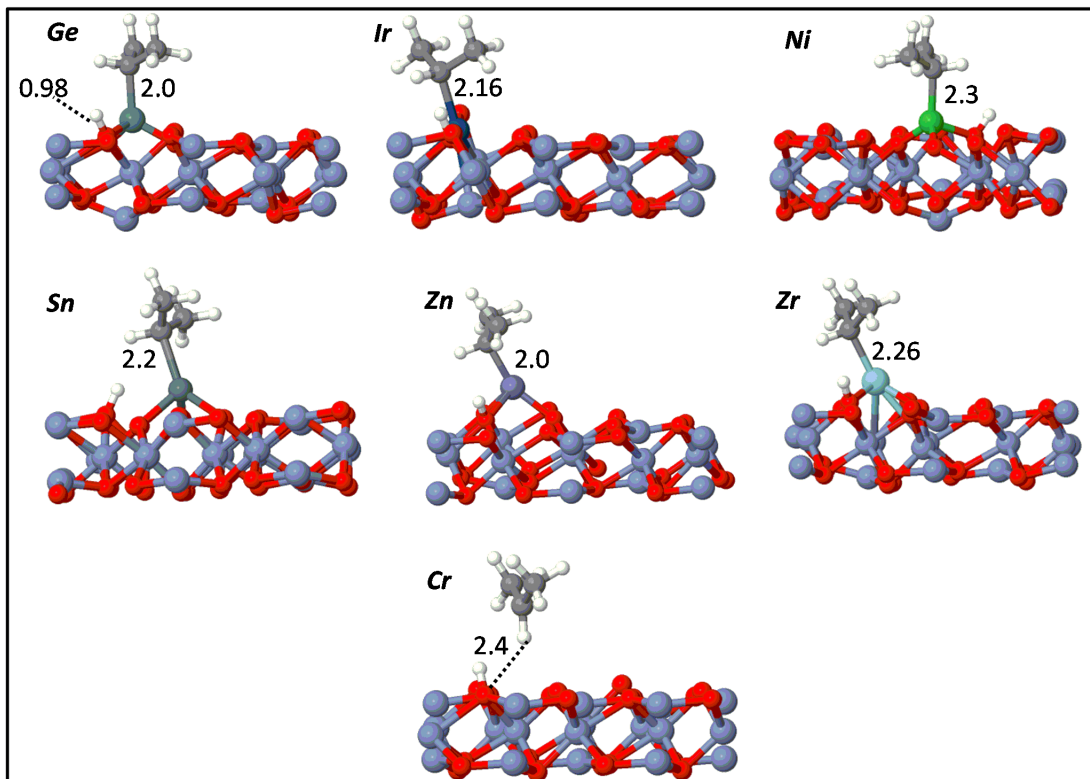

Figure S5. Formation of  $C_3H_7$  specie on all surface.

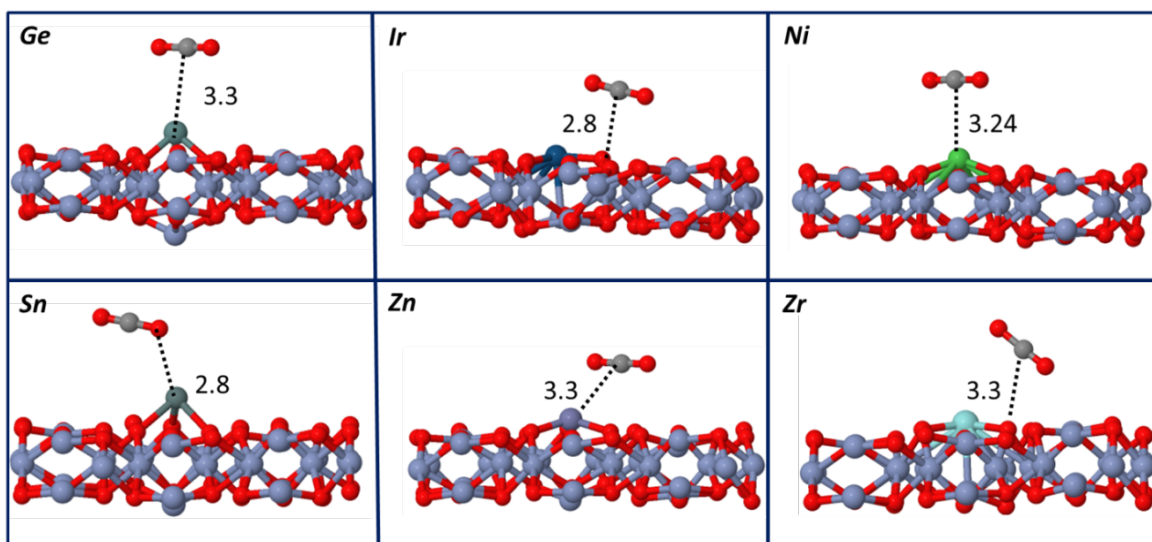

Figure S6. The physisorption of  $CO_2$  molecule on M- $Cr_2O_3$  surfaces.

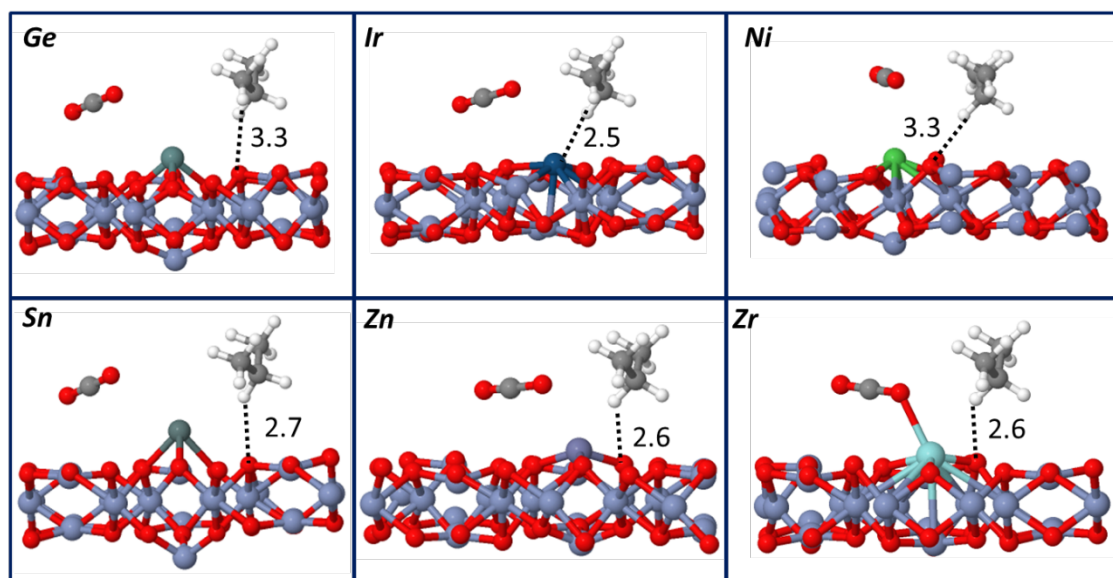

Figure S7. Physisorption adsorption of propane molecule on doped catalytic surfaces.

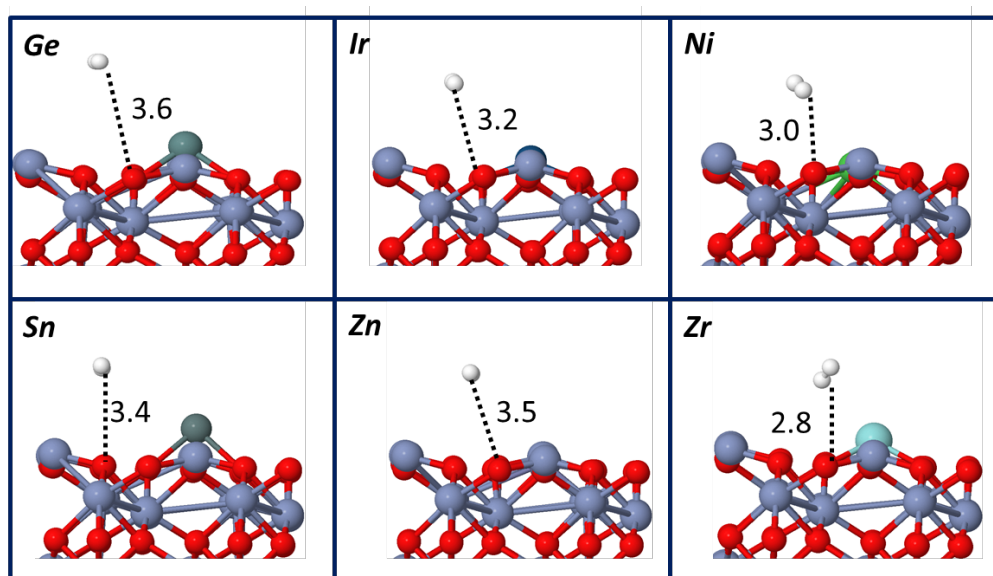

Figure S8. Removal of H-atoms from catalytic surfaces.

Table S1 Formation energies of M-Cr<sub>2</sub>O<sub>3</sub> surfaces.

| Surfaces                          | Formation energy |
|-----------------------------------|------------------|
| Ge-Cr <sub>2</sub> O <sub>3</sub> | -2.04            |
| Ir-Cr <sub>2</sub> O <sub>3</sub> | -0.52            |
| Ni-Cr <sub>2</sub> O <sub>3</sub> | -2.06            |
| Sn-Cr <sub>2</sub> O <sub>3</sub> | -1.92            |
| Zn-Cr <sub>2</sub> O <sub>3</sub> | -1.36            |
| Zr-Cr <sub>2</sub> O <sub>3</sub> | -2.06            |

Table S2. The DRC analysis without the CO<sub>2</sub> molecule.

| Reactions                                                                                           | DRC      |          |          |          |          |          |          |
|-----------------------------------------------------------------------------------------------------|----------|----------|----------|----------|----------|----------|----------|
|                                                                                                     | Ge       | Ir       | Ni       | Sn       | Zn       | Zr       | Cr       |
| CH <sub>3</sub> CH <sub>2</sub> CH <sub>3</sub> * + * →<br>CH <sub>3</sub> CHCH <sub>3</sub> * + H* | 8.95E-01 | 9.95E-01 | 9.91E-01 | 9.73E-01 | 9.82E-01 | 3.74E-02 | 9.41E-01 |
| CH <sub>3</sub> CHCH <sub>3</sub> * + * →<br>CH <sub>3</sub> CHCH <sub>2</sub> * + H*               | 6.99E-02 | 3.54E-03 | 6.31E-03 | 1.79E-02 | 1.17E-02 | 6.42E-01 | 3.91E-02 |
| H* + H* → H <sub>2</sub> * + *                                                                      | 3.50E-02 | 1.77E-03 | 3.17E-03 | 8.93E-03 | 5.85E-03 | 3.21E-01 | 1.96E-02 |
| $\sum_i x_i$                                                                                        | 1.00E+00 |

Table S3. The DRC analysis with CO<sub>2</sub> molecule.

| Reactions                                                                                              | DRC      |          |           |           |          |          |          |
|--------------------------------------------------------------------------------------------------------|----------|----------|-----------|-----------|----------|----------|----------|
|                                                                                                        | Ge       | Ir       | Ni        | Sn        | Zn       | Zr       | Cr       |
| CH <sub>3</sub> CH <sub>2</sub> CH <sub>3</sub> * + * →<br>CH <sub>3</sub> CHCH <sub>3</sub> * + H*    | 1.00E+00 | 1.00E+00 | 1.00E+00  | 1.00E+00  | 9.99E-01 | 9.91E-01 | 9.08E-01 |
| CH <sub>3</sub> CHCH <sub>3</sub> * + * →<br>CH <sub>3</sub> CHCH <sub>2</sub> * + H*                  | 1.82E-04 | 4.34E-06 | 2.35E-07  | 1.28E-07  | 3.59E-04 | 5.97E-03 | 6.13E-02 |
| H* + H* → H <sub>2</sub> * + *                                                                         | 1.32E-04 | 2.25E-06 | 4.30E-06  | 1.04E-07  | 2.07E-04 | 3.20E-03 | 3.07E-02 |
| CO <sub>2</sub> * + * → CO* + O*                                                                       | 1.06E-14 | 3.55E-16 | -1.29E-13 | -1.78E-16 | 5.68E-13 | 5.87E-11 | 4.44E-16 |
| CH <sub>3</sub> CH <sub>2</sub> CH <sub>3</sub> * + O* →<br>CH <sub>3</sub> CHCH <sub>3</sub> * + OH*  | 1.06E-14 | 3.55E-16 | 4.61E-13  | -1.78E-16 | 6.48E-13 | 5.86E-11 | 4.44E-16 |
| CH <sub>3</sub> CHCH <sub>3</sub> * + OH* →<br>CH <sub>3</sub> CHCH <sub>2</sub> * + H <sub>2</sub> O* | 1.06E-14 | 4.56E-14 | 4.99E-13  | -1.78E-16 | 5.42E-13 | 5.86E-11 | 2.72E-14 |
| $\sum_i x_i$                                                                                           | 1.00E+00 | 1.00E+00 | 1.00E+00  | 1.00E+00  | 1.00E+00 | 1.00E+00 | 1.00E+00 |

Table S4. The rate constant for the elementary steps.

| Reactions                                                                                             | Rate constant |           |
|-------------------------------------------------------------------------------------------------------|---------------|-----------|
|                                                                                                       | $k_{fwd}$     | $k_{bwd}$ |
| *Cr <sub>2</sub> O <sub>3</sub> surface                                                               |               |           |
| CO <sub>2</sub> + * → CO <sub>2</sub> *                                                               | 1.40E+07      | 3.17E+17  |
| CH <sub>3</sub> CH <sub>2</sub> CH <sub>3</sub> * → CH <sub>3</sub> CH <sub>2</sub> CH <sub>3</sub> * | 1.40E+07      | 5.89E+10  |
| CH <sub>3</sub> CHCH <sub>2</sub> * → CH <sub>3</sub> CHCH <sub>2</sub> + *                           | 1.44E+08      | 7.24E+17  |
| H <sub>2</sub> O* → H <sub>2</sub> O + *                                                              | 2.20E+08      | 1.46E+18  |
| CH <sub>3</sub> CH <sub>2</sub> CH <sub>3</sub> * + * → CH <sub>3</sub> CHCH <sub>3</sub> * + H*      | 1.03E+02      | 2.71E+11  |
| CH <sub>3</sub> CHCH <sub>3</sub> * + * → CH <sub>3</sub> CHCH <sub>2</sub> * + H*                    | 4.39E+05      | 5.60E+09  |
| H* + H* → H <sub>2</sub> * + *                                                                        | 1.22E+09      | 5.92E-01  |
| CO <sub>2</sub> * + * → CO* + O*                                                                      | 3.82E+06      | 1.75E+11  |
| CH <sub>3</sub> CH <sub>2</sub> CH <sub>3</sub> * + O* → CH <sub>3</sub> CHCH <sub>3</sub> * + H*     | 1.48E+04      | 2.71E+11  |
| CH <sub>3</sub> CHCH <sub>3</sub> * + OH* → CH <sub>3</sub> CHCH <sub>2</sub> * + H <sub>2</sub> O*   | 2.91E+05      | 5.60E+09  |

|                                                                                                       |          |          |
|-------------------------------------------------------------------------------------------------------|----------|----------|
| <b>*Ge-Cr<sub>2</sub>O<sub>3</sub></b>                                                                |          |          |
| CO <sub>2</sub> + * → CO <sub>2</sub> *                                                               | 1.36E+07 | 4.16E+17 |
| CH <sub>3</sub> CH <sub>2</sub> CH <sub>3</sub> * → CH <sub>3</sub> CH <sub>2</sub> CH <sub>3</sub> * | 1.36E+07 | 1.97E+17 |
| CH <sub>3</sub> CHCH <sub>2</sub> * → CH <sub>3</sub> CHCH <sub>2</sub> + *                           | 1.39E+08 | 9.93E+17 |
| H <sub>2</sub> O* → H <sub>2</sub> O + *                                                              | 2.13E+08 | 1.92E+18 |
| CH <sub>3</sub> CH <sub>2</sub> CH <sub>3</sub> * + * → CH <sub>3</sub> CHCH <sub>3</sub> * + H*      | 1.81E+09 | 3.45E+11 |
| CH <sub>3</sub> CHCH <sub>3</sub> * + * → CH <sub>3</sub> CHCH <sub>2</sub> * + H*                    | 2.56E+09 | 4.53E+12 |
| H* + H* → H <sub>2</sub> * + *                                                                        | 2.13E+09 | 3.66E+00 |
| CO <sub>2</sub> * + * → CO* + O*                                                                      | 4.93E+08 | 2.29E+11 |
| CH <sub>3</sub> CH <sub>2</sub> CH <sub>3</sub> * + O* → CH <sub>3</sub> CHCH <sub>3</sub> * + H*     | 7.65E+08 | 3.45E+11 |
| CH <sub>3</sub> CHCH <sub>3</sub> * + OH* → CH <sub>3</sub> CHCH <sub>2</sub> * + H <sub>2</sub> O*   | 5.31E+09 | 8.97E+09 |
| <b>*Ir-Cr<sub>2</sub>O<sub>3</sub></b>                                                                |          |          |
| CO <sub>2</sub> + * → CO <sub>2</sub> *                                                               | 1.40E+07 | 3.17E+17 |
| CH <sub>3</sub> CH <sub>2</sub> CH <sub>3</sub> * → CH <sub>3</sub> CH <sub>2</sub> CH <sub>3</sub> * | 1.40E+07 | 1.08E+14 |
| CH <sub>3</sub> CHCH <sub>2</sub> * → CH <sub>3</sub> CHCH <sub>2</sub> + *                           | 1.44E+08 | 7.24E+17 |
| H <sub>2</sub> O* → H <sub>2</sub> O + *                                                              | 2.20E+08 | 1.46E+18 |
| CH <sub>3</sub> CH <sub>2</sub> CH <sub>3</sub> * + * → CH <sub>3</sub> CHCH <sub>3</sub> * + H*      | 1.46E+05 | 2.71E+11 |
| CH <sub>3</sub> CHCH <sub>3</sub> * + * → CH <sub>3</sub> CHCH <sub>2</sub> * + H*                    | 1.47E+09 | 5.60E+09 |
| H* + H* → H <sub>2</sub> * + *                                                                        | 9.21E+12 | 5.92E-01 |
| CO <sub>2</sub> * + * → CO* + O*                                                                      | 9.97E+07 | 1.75E+11 |
| CH <sub>3</sub> CH <sub>2</sub> CH <sub>3</sub> * + O* → CH <sub>3</sub> CHCH <sub>3</sub> * + H*     | 4.91E+08 | 2.71E+11 |
| CH <sub>3</sub> CHCH <sub>3</sub> * + OH* → CH <sub>3</sub> CHCH <sub>2</sub> * + H <sub>2</sub> O*   | 2.84E+10 | 5.60E+09 |
| <b>*Ni-Cr<sub>2</sub>O<sub>3</sub></b>                                                                |          |          |
| CO <sub>2</sub> + * → CO <sub>2</sub> *                                                               | 1.29E+07 | 6.73E+17 |
| CH <sub>3</sub> CH <sub>2</sub> CH <sub>3</sub> * → CH <sub>3</sub> CH <sub>2</sub> CH <sub>3</sub> * | 1.29E+07 | 3.36E+16 |
| CH <sub>3</sub> CHCH <sub>2</sub> * → CH <sub>3</sub> CHCH <sub>2</sub> + *                           | 1.32E+08 | 1.74E+18 |
| H <sub>2</sub> O* → H <sub>2</sub> O + *                                                              | 2.01E+08 | 3.11E+18 |
| CH <sub>3</sub> CH <sub>2</sub> CH <sub>3</sub> * + * → CH <sub>3</sub> CHCH <sub>3</sub> * + H*      | 6.33E+08 | 5.19E+11 |
| CH <sub>3</sub> CHCH <sub>3</sub> * + * → CH <sub>3</sub> CHCH <sub>2</sub> * + H*                    | 1.67E+13 | 5.20E+12 |
| H* + H* → H <sub>2</sub> * + *                                                                        | 5.48E+09 | 7.88E+01 |
| CO <sub>2</sub> * + * → CO* + O*                                                                      | 6.66E+08 | 3.60E+11 |
| CH <sub>3</sub> CH <sub>2</sub> CH <sub>3</sub> * + O* → CH <sub>3</sub> CHCH <sub>3</sub> * + H*     | 3.41E+10 | 5.19E+11 |
| CH <sub>3</sub> CHCH <sub>3</sub> * + OH* → CH <sub>3</sub> CHCH <sub>2</sub> * + H <sub>2</sub> O*   | 7.16E+12 | 1.98E+10 |
| <b>*Sn-Cr<sub>2</sub>O<sub>3</sub></b>                                                                |          |          |
| CO <sub>2</sub> + * → CO <sub>2</sub> *                                                               | 1.40E+07 | 3.17E+17 |
| CH <sub>3</sub> CH <sub>2</sub> CH <sub>3</sub> * → CH <sub>3</sub> CH <sub>2</sub> CH <sub>3</sub> * | 1.40E+07 | 2.65E+11 |
| CH <sub>3</sub> CHCH <sub>2</sub> * → CH <sub>3</sub> CHCH <sub>2</sub> + *                           | 1.44E+08 | 7.24E+17 |
| H <sub>2</sub> O* → H <sub>2</sub> O + *                                                              | 2.20E+08 | 1.46E+18 |
| CH <sub>3</sub> CH <sub>2</sub> CH <sub>3</sub> * + * → CH <sub>3</sub> CHCH <sub>3</sub> * + H*      | 5.59E-03 | 2.71E+11 |
| CH <sub>3</sub> CHCH <sub>3</sub> * + * → CH <sub>3</sub> CHCH <sub>2</sub> * + H*                    | 5.59E+10 | 4.18E+12 |
| H* + H* → H <sub>2</sub> * + *                                                                        | 1.22E+09 | 5.92E-01 |
| CO <sub>2</sub> * + * → CO* + O*                                                                      | 9.97E+07 | 1.75E+11 |
| CH <sub>3</sub> CH <sub>2</sub> CH <sub>3</sub> * + O* → CH <sub>3</sub> CHCH <sub>3</sub> * + H*     | 6.83E+08 | 2.71E+11 |
| CH <sub>3</sub> CHCH <sub>3</sub> * + OH* → CH <sub>3</sub> CHCH <sub>2</sub> * + H <sub>2</sub> O*   | 1.67E+13 | 1.11E+13 |
| <b>*Zn-Cr<sub>2</sub>O<sub>3</sub></b>                                                                |          |          |
| CO <sub>2</sub> + * → CO <sub>2</sub> *                                                               | 1.36E+07 | 4.16E+17 |

|                                                                                                          |          |          |
|----------------------------------------------------------------------------------------------------------|----------|----------|
| $\text{CH}_3\text{CH}_2\text{CH}_3^* \rightarrow \text{CH}_3\text{CH}_2\text{CH}_3^*$                    | 1.36E+07 | 1.54E+16 |
| $\text{CH}_3\text{CHCH}_2^* \rightarrow \text{CH}_3\text{CHCH}_2 + ^*$                                   | 1.39E+08 | 9.93E+17 |
| $\text{H}_2\text{O}^* \rightarrow \text{H}_2\text{O} + ^*$                                               | 2.13E+08 | 1.92E+18 |
| $\text{CH}_3\text{CH}_2\text{CH}_3^* + ^* \rightarrow \text{CH}_3\text{CHCH}_3^* + \text{H}^*$           | 9.25E+06 | 3.45E+11 |
| $\text{CH}_3\text{CHCH}_3^* + ^* \rightarrow \text{CH}_3\text{CHCH}_2^* + \text{H}^*$                    | 1.81E+08 | 4.53E+12 |
| $\text{H}^* + \text{H}^* \rightarrow \text{H}_2^* + ^*$                                                  | 2.13E+09 | 3.66E+00 |
| $\text{CO}_2^* + ^* \rightarrow \text{CO}^* + \text{O}^*$                                                | 2.02E+08 | 2.29E+11 |
| $\text{CH}_3\text{CH}_2\text{CH}_3^* + \text{O}^* \rightarrow \text{CH}_3\text{CHCH}_3^* + \text{H}^*$   | 1.56E+07 | 3.45E+11 |
| $\text{CH}_3\text{CHCH}_3^* + \text{OH}^* \rightarrow \text{CH}_3\text{CHCH}_2^* + \text{H}_2\text{O}^*$ | 1.01E+04 | 8.97E+09 |
| <b>*Zr-Cr<sub>2</sub>O<sub>3</sub></b>                                                                   |          |          |
| $\text{CO}_2 + ^* \rightarrow \text{CO}_2^*$                                                             | 1.36E+07 | 4.16E+17 |
| $\text{CH}_3\text{CH}_2\text{CH}_3^* \rightarrow \text{CH}_3\text{CH}_2\text{CH}_3^*$                    | 1.36E+07 | 2.21E+14 |
| $\text{CH}_3\text{CHCH}_2^* \rightarrow \text{CH}_3\text{CHCH}_2 + ^*$                                   | 1.39E+08 | 9.93E+17 |
| $\text{H}_2\text{O}^* \rightarrow \text{H}_2\text{O} + ^*$                                               | 2.13E+08 | 1.92E+18 |
| $\text{CH}_3\text{CH}_2\text{CH}_3^* + ^* \rightarrow \text{CH}_3\text{CHCH}_3^* + \text{H}^*$           | 2.05E+04 | 3.45E+11 |
| $\text{CH}_3\text{CHCH}_3^* + ^* \rightarrow \text{CH}_3\text{CHCH}_2^* + \text{H}^*$                    | 1.56E+06 | 4.53E+12 |
| $\text{H}^* + \text{H}^* \rightarrow \text{H}_2^* + ^*$                                                  | 2.13E+09 | 3.66E+00 |
| $\text{CO}_2^* + ^* \rightarrow \text{CO}^* + \text{O}^*$                                                | 2.02E+08 | 2.29E+11 |
| $\text{CH}_3\text{CH}_2\text{CH}_3^* + \text{O}^* \rightarrow \text{CH}_3\text{CHCH}_3^* + \text{H}^*$   | 3.81E+07 | 3.45E+11 |
| $\text{CH}_3\text{CHCH}_3^* + \text{OH}^* \rightarrow \text{CH}_3\text{CHCH}_2^* + \text{H}_2\text{O}^*$ | 3.80E+10 | 8.97E+09 |

## References

- [1]. Filot, I.A., Introduction to Microkinetic Modeling, Technische Universiteit Eindhoven, 2018.
